# Supplementary material for: Postprandial Metabolic Response to Rapeseed Protein in Healthy Subjects
Source: MDPI journal article supplement (doi:10.3390/nu12082270), 2020-07-29
Supplement: s1 [file s1]

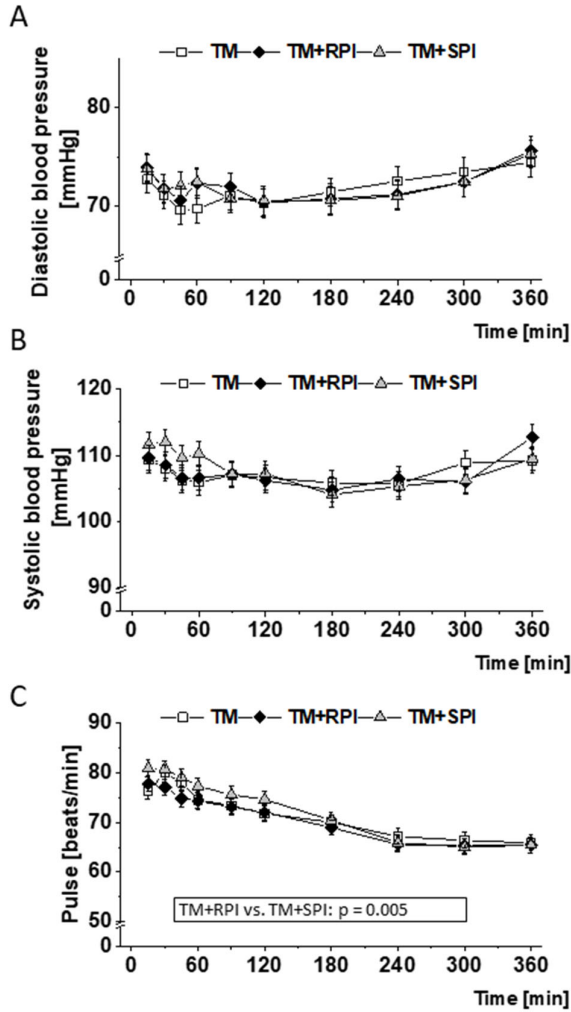

**Figure S2:** Postprandial (A) diastolic blood pressure, (B) systolic blood pressure and (C) pulse of study participants who received either the test meal (TM) without additional protein (□), the TM with 28 g rapeseed protein isolate (RPI) (◆) or the TM with 28 g soy protein isolate (SPI) (▲). Differences in blood pressure and pulse after the ingestion of the three test meals over 6 h were evaluated with a mixed model to test the effects of treatment, time, and their interaction (treatment × time) on each parameter. The value at baseline (before treatment) was considered a covariate. All p values were adjusted according to the Tukey-Kramer multiple group comparison procedure. For time point analysis, the paired t test was applied. Significance was accepted as  $p < 0.05$ . Data are presented as LSMs ± SEs (n = 19).

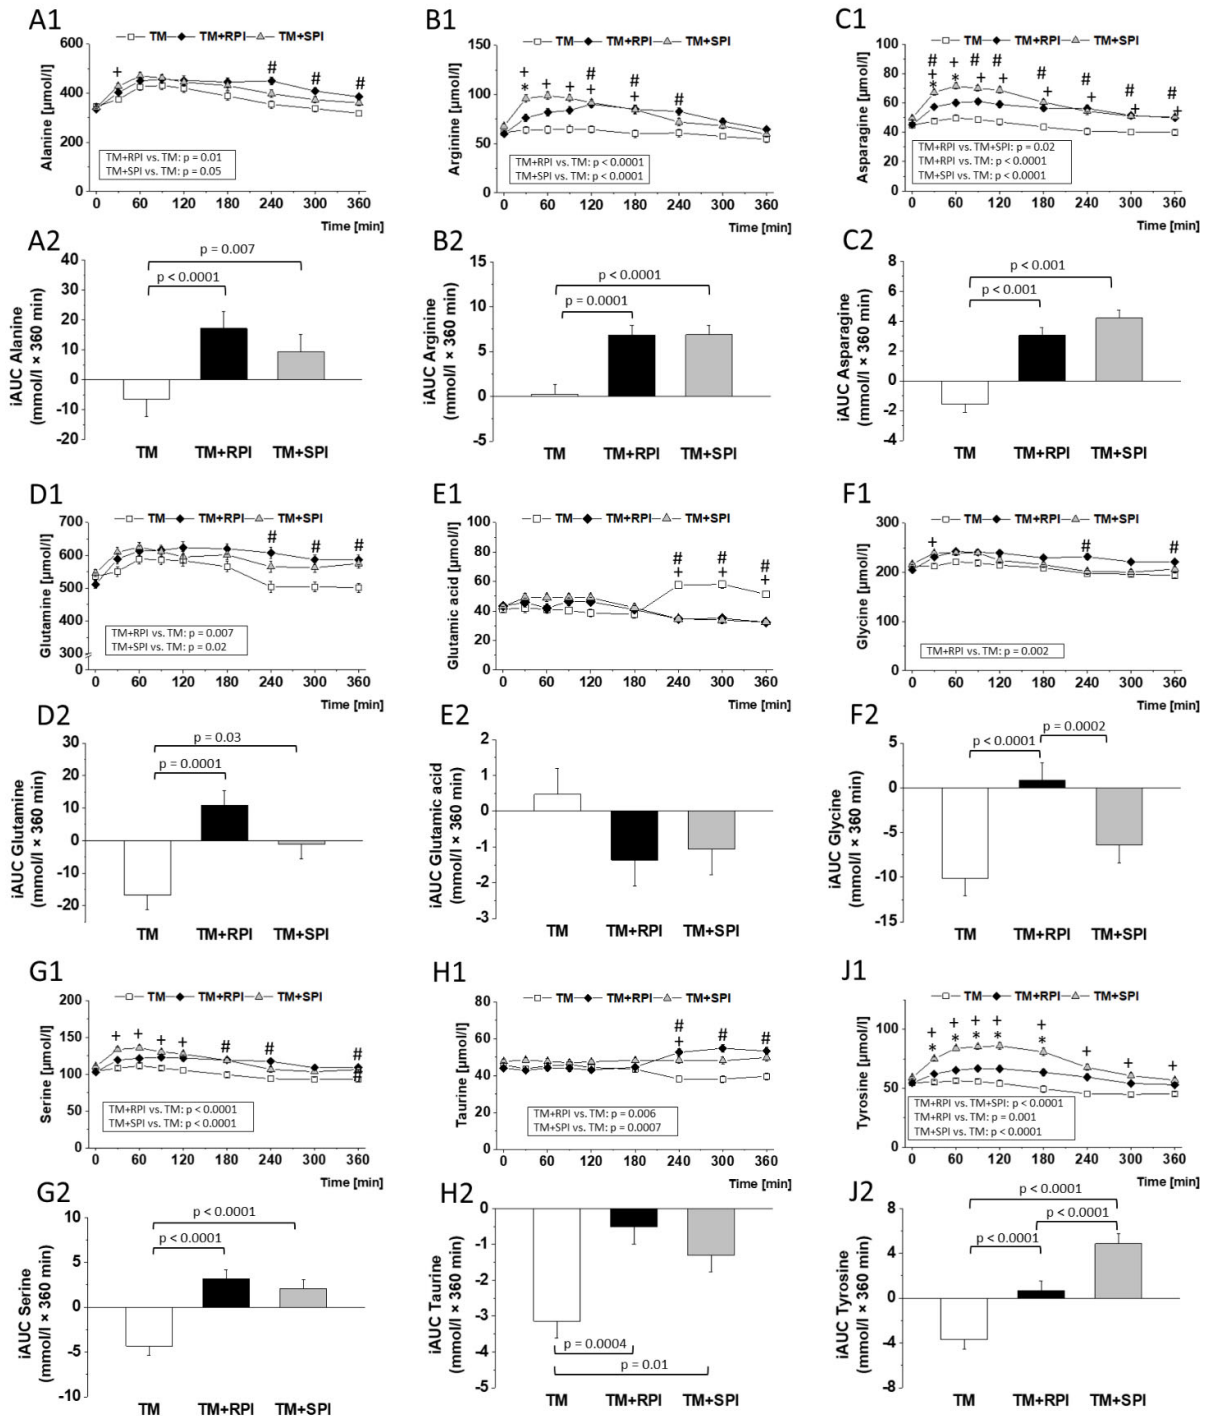

**Figure S3** Postprandial response of the test meal (TM) with either no additional protein as reference (□), 28 g rapeseed protein isolate (RPI) (◆) or 28 g soy protein isolate (SPI) (▲) with regard to plasma levels and the incremental area under the curve (iAUC) of (A1 + 2) alanine, (B1 + 2) arginine, (C1 + 2) asparagine, (D1 + 2) glutamine, (E1 + 2) glutamic acid, (F1 + 2) glycine, (G1 + 2) serine, (H1 + 2) taurine and (J1 + 2) tyrosine. Differences in amino acid concentrations after the ingestion of the three test meals over 6 h were evaluated with a mixed model to test the effects of treatment, time, and their interaction (treatment × time) on each parameter. The value at baseline (before treatment) was considered a covariate. The iAUC was calculated for each subject and treatment using the trapezoidal rule. The mixed-models procedure (PROC MIXED) was used for all traits. For iAUC, treatment, sex, sequence

and period were set as fixed effects, and subject was included as a random effect. All p values were adjusted according to the Tukey-Kramer multiple group comparison procedure. For time point analysis, the paired t test was applied. Significance was accepted as  $p < 0.05$ . Data are presented as LSMs  $\pm$  SEs (n = 19); #  $p < 0.05$  TM vs. TM+RPI; +  $p < 0.05$  TM vs. TM+SPI; \*  $p < 0.05$  TM+RPI vs. TM+SPI.

**Table S1.** Baseline amino acid concentrations of the study participants

| Amino acid [ $\mu\text{mol/l}$ ] |                           |
|----------------------------------|---------------------------|
| Alanine                          | 386 $\pm$ 14.9 (315; 557) |
| Arginine                         | 61 $\pm$ 4.6 (26; 100)    |
| Asparagine                       | 51 $\pm$ 1.8 (35; 68)     |
| Glutamine                        | 602 $\pm$ 22.5 (395; 766) |
| Glutamic acid                    | 44 $\pm$ 4.1 (22; 96)     |
| Glycine                          | 237 $\pm$ 15.1 (131; 403) |
| Histidine                        | 91 $\pm$ 3.6 (73; 130)    |
| Isoleucine                       | 62 $\pm$ 3.0 (40; 92)     |
| Leucine                          | 126 $\pm$ 6.0 (79; 184)   |
| Lysine                           | 168 $\pm$ 6.3 (114; 233)  |
| Methionine                       | 26 $\pm$ 0.9 (20; 33)     |
| Phenylalanine                    | 60 $\pm$ 1.6 (49; 74)     |
| Serine                           | 115 $\pm$ 4.876; 155)     |
| Taurine                          | 54 $\pm$ 2.5 (33;75)      |
| Threonine                        | 138 $\pm$ 9.1 (77; 231)   |
| Tryptophan                       | 58 $\pm$ 1.9 (41; 76)     |
| Tyrosine                         | 60 $\pm$ 3.1 (36;81)      |
| Valine                           | 231 $\pm$ 8.4 (183; 319)  |

Values are given as mean  $\pm$  SEM (min, max).

**Table S2** iAUC and confidence intervals for plasma parameters after consumption of the three test meals

| iAUC                             | TM    | 95% CI       | TM+RPI                  | 95% CI             | TM+SPI        | 95% CI             |
|----------------------------------|-------|--------------|-------------------------|--------------------|---------------|--------------------|
| Glucose [mmol/l × 180 min]       | 103   | 59.2; 147    | <b>52.0<sup>†</sup></b> | <b>8.03; 96.0</b>  | 79.7          | 35.7; 123          |
| Insulin [IU/l × 180 min]         | 4.88  | 3.93; 5.83   | 5.42                    | 4.47; 6.39         | <b>6.42*</b>  | <b>5.47; 7.37</b>  |
| Triglycerides [mmol/l × 360 min] | -25.8 | -48.7; -2.85 | <b>6.00*</b>            | <b>-16.9; 28.9</b> | <b>-0.13*</b> | <b>-23.0; 22.8</b> |
| Cholesterol [mmol/l × 360 min]   | -241  | -280; -203   | -214                    | -252; -175         | -193          | -231; -155         |
| Urea [mmol/l × 360 min]          | -168  | -230; -107   | <b>132*</b>             | <b>70.2; 193</b>   | <b>154*</b>   | 92.9; 215          |
| Phosphate [mmol/l × 360 min]     | -62.2 | -82.8; -41.7 | -65.6                   | -86.1; -45.1       | -51.7         | -72.2; -31.2       |
| PTH [ng/ml × 360 min]            | -1.72 | -3.80; 0.37  | -1.16                   | -3.25; 0.92        | <b>-0.07*</b> | <b>-2.15; 2.02</b> |
| FGF23 [ng/ml × 360 min]          | -2.13 | -2.94; -1.33 | -1.76                   | -2.56; -0.96       | -1.82         | -2.63; -1.02       |
| Calcium [mmol/l × 360 min]       | -88.3 | -120; -57.0  | -94.8                   | -126; -63.5        | -78.5         | -110; -47.3        |
| Zinc [mg/l × 360 min]            | -71.8 | -76.8; -23.0 | -74.3                   | -85.4; -2.0        | -58.5         | -84.6; -32.4       |
| Copper [mg/l × 360 min]          | -31.9 | 2.49; 66.0   | -34.2                   | -63.8; -0.12       | -4.11         | -27.6; 35.9        |
| IL-6 [ng/ml × 360 min]           | 1.20  | 0.54; 1.96   | 1.32                    | 0.61; 2.15         | 2.20          | 0.58; 2.05         |

Values are LSMs, n = 19; \* Different from TM, p < 0.05; † p = 0.06;

The incremental area under the curve (iAUC) was calculated for each subject and treatment using the trapezoidal rule. The mixed-models procedure (PROC MIXED) was used for all traits. For the iAUC treatment, sex, sequence and period were set as fixed effects, and subject was included as a random effect. All p values were adjusted according to the Tukey-Kramer multiple group comparison procedure.

**Table S3** iAUCs and confidence intervals of plasma amino acids after the consumption of the three test meals

| iAUC          | TM    | 95% CI       | TM+RPI        | 95% CI             | TM+SPI        | 95% CI              |
|---------------|-------|--------------|---------------|--------------------|---------------|---------------------|
| Alanine       | -6.08 | -18.5; 5.33  | <b>17.9*</b>  | <b>5.27; 29.1</b>  | <b>10.2*</b>  | <b>-2.50; 21.3</b>  |
| Arginine      | 0.31  | -1.85; 2.36  | <b>7.08*</b>  | <b>4.77; 8.97</b>  | <b>7.11*</b>  | <b>4.80; 9.00</b>   |
| Asparagine    | -1.59 | -2.63; -0.53 | <b>2.99*</b>  | <b>1.97; 4.11</b>  | <b>4.21*</b>  | <b>3.15; 5.25</b>   |
| Glutamine     | -17.1 | -25.6; -7.90 | <b>10.6*</b>  | <b>2.10; 19.8</b>  | <b>-1.52*</b> | <b>-10.0; 7.66</b>  |
| Glutamic acid | 0.52  | -0.99; 1.94  | -1.30         | -2.86; 0.13        | -1.06         | -2.53; 0.40         |
| Glycine       | -9.99 | -13.3; -6.62 | <b>0.88*°</b> | <b>-1.01; 5.86</b> | <b>-6.36</b>  | <b>-9.80; -3.09</b> |
| Histidine     | -2.34 | -4.52; -0.15 | <b>2.88*°</b> | <b>0.70; 5.05</b>  | <b>-2.09</b>  | <b>-4.27; 0.09</b>  |
| Isoleucine    | -2.41 | -4.34; -0.48 | <b>9.97*</b>  | <b>8.05; 11.9</b>  | <b>12.1*</b>  | <b>10.1; 14.0</b>   |
| Leucine       | -6.98 | -9.75; -4.22 | <b>10.7*</b>  | <b>7.89; 13.4</b>  | <b>10.3*</b>  | <b>7.50; 13.0</b>   |
| Lysine        | -13.8 | -17.0; -10.7 | <b>0.84*</b>  | <b>-2.40; 4.07</b> | <b>-0.51*</b> | <b>-3.66; 2.64</b>  |
| Methionine    | -1.79 | -2.35; -1.23 | <b>1.61*°</b> | <b>0.90; 2.31</b>  | <b>-0.69*</b> | <b>-1.31; -0.06</b> |
| Phenylalanine | 0.09  | -1.39; 1.56  | <b>5.56*</b>  | <b>4.09; 7.03</b>  | <b>6.68*</b>  | <b>5.21; 8.15</b>   |
| Serine        | -4.28 | -6.43; -2.26 | <b>3.09*</b>  | <b>1.08; 5.24</b>  | <b>2.03*</b>  | <b>0.01; 4.18</b>   |
| Taurine       | -3.14 | -4.09; -2.20 | <b>-0.63*</b> | <b>-1.46; 0.43</b> | <b>-1.41*</b> | <b>-2.25; -0.36</b> |
| Threonine     | -7.71 | -10.0; -5.22 | <b>4.65*°</b> | <b>3.24; 8.17</b>  | <b>0.81*</b>  | <b>-1.60; 3.18</b>  |
| Tryptophan    | -3.85 | -4.99; -2.72 | <b>1.44*°</b> | <b>0.30; 2.57</b>  | <b>0.06*</b>  | <b>-1.08; 1.19</b>  |
| Tyrosine      | -3.54 | -5.43; -1.94 | <b>0.83*°</b> | <b>-1.08; 2.46</b> | <b>4.78*</b>  | <b>3.10; 6.63</b>   |
| Valine        | -12.7 | -16.8; -8.54 | <b>16.3*</b>  | <b>12.1; 20.4</b>  | <b>12.9*</b>  | <b>8.78; 17.0</b>   |

Values are LSMs, n = 19; \* Different from TM, p < 0.05; ° Different from TM+SPI, p < 0.05

The incremental area under the curve (iAUC) was calculated for each subject and treatment using the trapezoidal rule. The mixed-models procedure (PROC MIXED) was used for all traits. For iAUC treatment, sex, sequence and period were set as fixed effects, and subject was included as a random effect. All p values were adjusted according to the Tukey-Kramer multiple group comparison procedure.

CI, confidence interval
